# Supplementary material
Source: Research Square preprint supplement (doi:10.21203/rs.3.rs-8951484/v1)
Supplement: Supplementary file 1 [file 2b8b33af55ef7fff01930b7d.docx]

Stephanoside B Modulates PPARγ-Dependent Metabolic Genes and Lengthens the Circadian *Bmal1* Oscillation Period in Differentiated Myotubes Revealed by Real-Time Bioluminescence

Papawee Saiki,*Tatsunosuke Tomita,* and Saori Yamamoto

Cellular and Molecular Biotechnology Research Institute, National Institute of Advanced Industrial Science and Technology, Tsukuba, Ibaraki 305-8565, Japan

* Correspondence and requests for materials should be addressed to Papawee Saiki (E-mail: papawee-saiki@aist.go.jp) and Tatsunosuke Tomita (E-mail: tatsunosuke-tomita@aist.go.jp)

**Supplement data**

**Table S1** Primers for qRT- PCR.

| Target gene | Direction | Primer (5′⭢3′) |
| --- | --- | --- |
| *Ppargc1α* | Forward | GTAGGCCCAGGTACGACAGC |
|  | Reverse | GCTCTTTGCGGTATTCATCCC |
| *Pparg* | Forward | AACTCTGGGAGATTCTCCTGTTGA |
|  | Reverse | TGGTAATTTCTTGTGAAGTGCTCATA |
| *Per2* | Forward | GAAAGCTGTCACCACCATAGAA |
|  | Reverse | AACTCGCACTTCCTTTTCAGG |
| *Bmal1* | Forward | GGCCGAATGATTGCTGAGGAAATCATGG |
|  | Reverse | TTACAGCGGCCATGGCAAGTCACTAAAG |
| *Nr1d1* | Forward | CCTGGACTCCAACAACAACAC |
| Reverse | ACACTCGGTTGCTGTCCTCCA |
| *Cry1* | Forward | CACTGGTTCCGAAAGGGACTC |
|  | Reverse | CTGAAGCAAAAATCGCCACCT |
| *Actb* | Forward | TACGCCAACACAGTGCTGTCTG |
|  | Reverse | TTTTCTGCGCAAGTTAGGTTTTGTC |

**
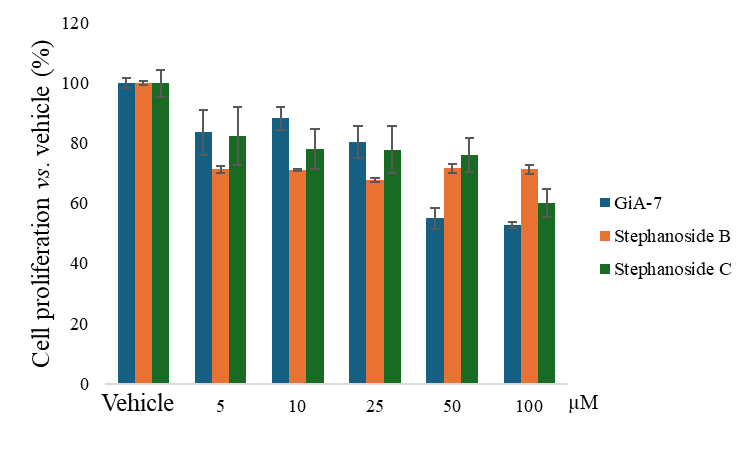
**

**Figure S1.** Effects of GiA-7, stephanoside B and C on C2C12 cells.

We incubated C2C12 cells with 5–100 μm of GiA-7, stephanoside B or C for 24 h. Cell proliferation was evaluated using MTS assays as described in Materials and Methods. MTS, 3-(4,5-dimethylthiazol-2-yl)-5-(3-carboxymethoxyphenyl)-2-(4-sulfophenyl)-2H-tetrazolium assay.


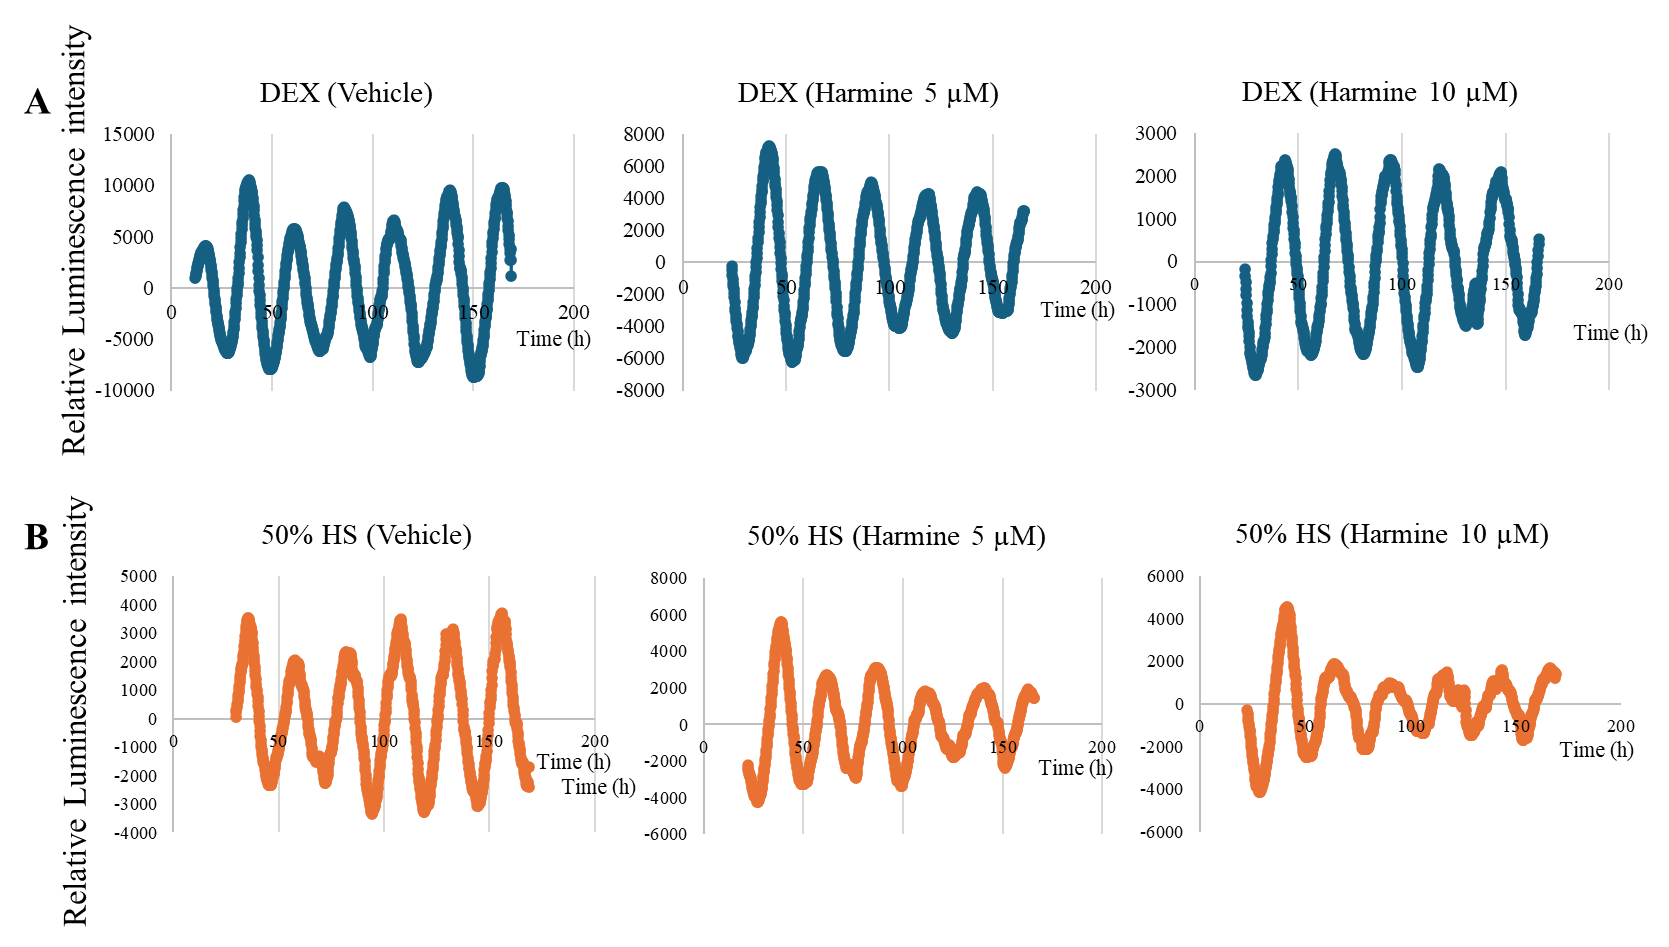


**Figure S2.** Transcriptional activity of *Bmal1* in C2C12 myotubes incubated with harmine under various synchronization conditions monitored in real-time.

We transfected and cultured C2C12 cells with *Bmal1*-luciferase reporter plasmids for 3 days to differentiate into myotubes. We then synchronized circadian rhythms in myotubes for 2 h using either 100 nM DEX (A) or 50% HS (B), followed by harmine (5 or 10 µM). *Bmal1* promoter activity was continuously monitored as bioluminescence intensity in real time. We confirmed that 100 nM DEX was sufficient to reset circadian periods in C2C12 cells. DEX, dexamethasone; HS, horse serum.


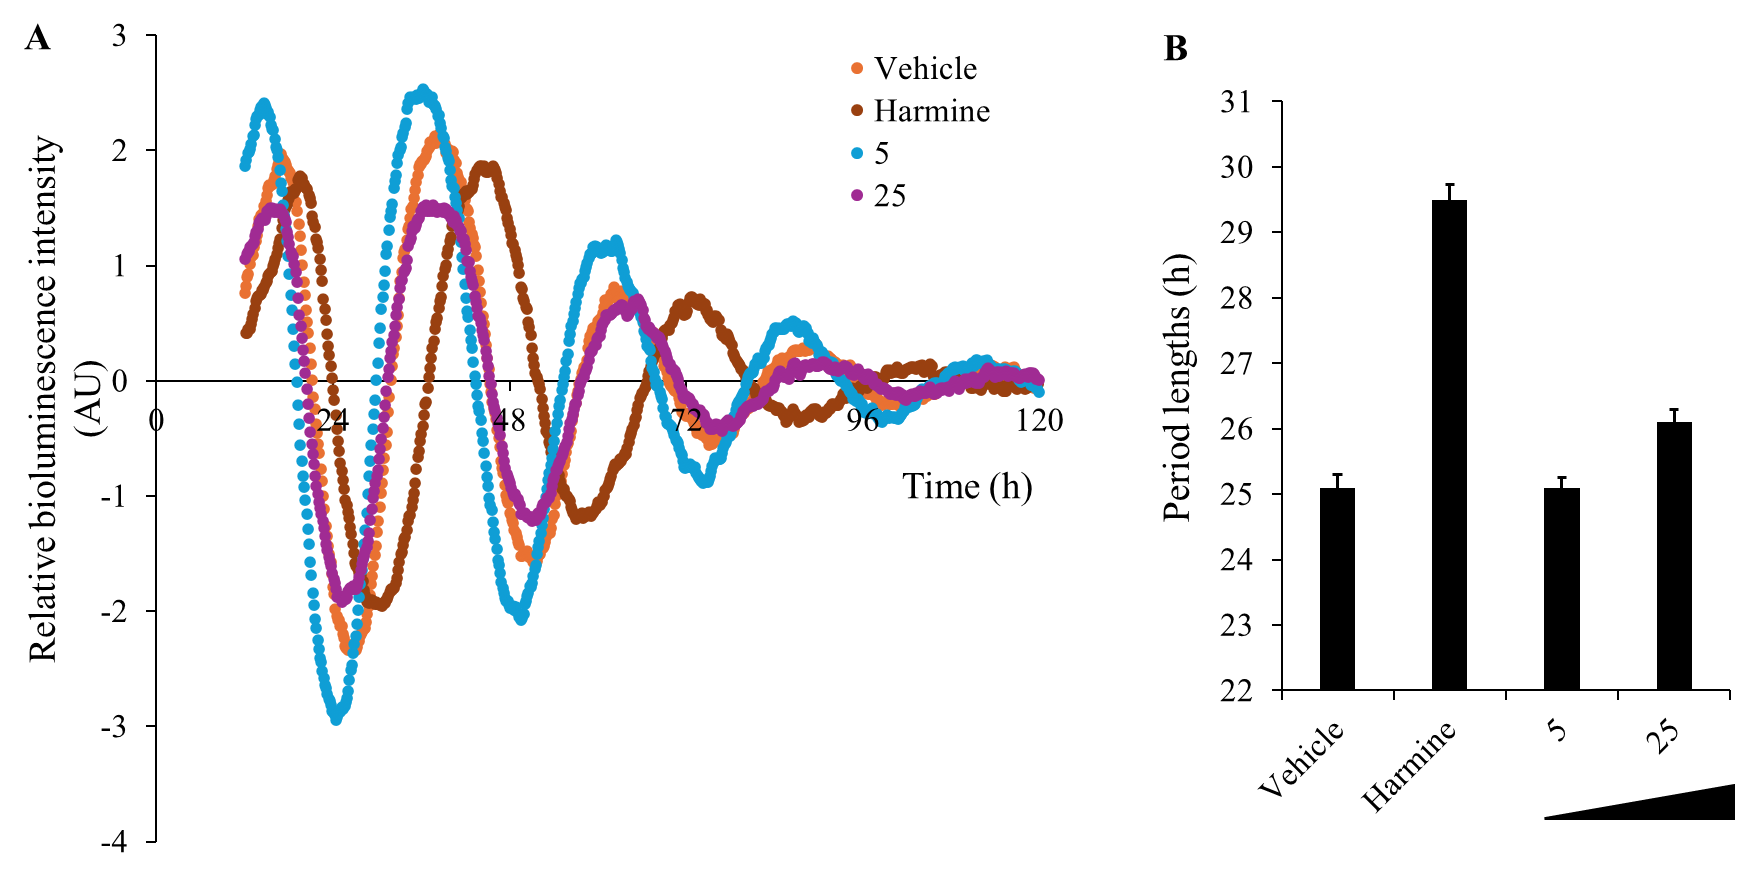


**Figure S3.** Effects of stephanoside B at 5 and 25 µM on *Bmal1*-luciferase activity in stable NIH3T3 cells.

(A) Real-time bioluminescence profiles and (B) analysis of period lengths estimated by curve fitting. This extract elongated the circadian periods of *Bmal1* in NIH3T3 fibroblasts and C2C12 muscle cells, indicating that circadian period was elongated to both cell types. AU, arbitrary units.
